# Supplementary material for: Sialic acid and N-acyl sialic acid analog production by fermentation of metabolically and genetically engineered Escherichia coli
Source: Royal Society of Chemistry journal article supplement (doi:10.1039/b703519e), 2007-01-01
Supplement: b703519e.pdf [file b703519e.pdf]

**Sialic acid and *N*-acyl sialic acid analog production by fermentation of metabolically and genetically engineered *Escherichia coli***

Benjamin R. Lundgren and Christopher N. Boddy\*

Department of Chemistry, Syracuse University, Syracuse, NY 13244-4100, cnboddy@syr.edu

**Supplementary Information**

Table S1. Primer sequences with engineered restriction sites (**bold**) used for cloning of *neuC*, *neuB* and *glmS* genes. Primers were used at 0.1  $\mu$ M for PCR reactions. Cut sites listed were those used to clone the respected gene into pKH22.

| GENE        | FORWARD                                        | REVERSE                                         | CUT SITES  |
|-------------|------------------------------------------------|-------------------------------------------------|------------|
| <i>neuC</i> | cgca <b>gctag</b> caaaaggattctttgcattacaggtacc | cagc <b>gaattc</b> ctagtcataactggtgtacatt       | NheI/EcoRI |
| <i>neuB</i> | cgca <b>catatg</b> caaaacaacaacgaatttaaattgg   | cagc <b>gaattc</b> ttattcaatatcagtttttgattgagca | NdeI/EcoRI |
| <i>glmS</i> | gcgca <b>tatgt</b> gtggaattgtggcgcg            | gcgc <b>gaattc</b> tactcaaccgtaaccgatttgc       | NdeI/EcoRI |
